# Supplementary material for: Variation in Pea (Pisum sativum L.) Seed Quality Traits Defined by Physicochemical Functional Properties
Source: PubMed Central journal article supplement (PMC6915640; doi:10.3390/foods8110570), 2019-11-13
Supplement: foods-08-00570-s001.pdf [file foods-08-00570-s001.pdf]

**Table S1** List of 105 pea accessions evaluated in 2014 in Cordoba, Spain, with the corresponding bank code number and origin

| <b>Accession</b> | <b>Bank Code</b> | <b>Origin</b> | <b>Accession</b> | <b>Bank Code</b> | <b>Origin</b>  | <b>Accession</b> | <b>Bank Code</b> | <b>Origin</b>  |
|------------------|------------------|---------------|------------------|------------------|----------------|------------------|------------------|----------------|
| LEGPS201         | PI 109865        | Venezuela     | LEGPS238         | PI 347401        | India          | LEGPS275         | n.a.             | Czech Republic |
| LEGPS202         | PI 122442        | Peru          | LEGPS239         | PI 358642        | Ethiopia       | LEGPS276         | n.a.             | Czech Republic |
| LEGPS203         | PI 142774        | Mexico        | LEGPS240         | PI 494079        | Chile          | LEGPS277         | n.a.             | Czech Republic |
| LEGPS204         | PI 143483        | Iran          | LEGPS241         | JI 502           | n.a.           | LEGPS278         | n.a.             | Czech Republic |
| LEGPS205         | PI 143486        | Iran          | LEGPS242         | JI 1213          | n.a.           | LEGPS279         | n.a.             | Czech Republic |
| LEGPS206         | PI 162692        | Argentina     | LEGPS243         | CGN16640         | Sudan          | LEGPS280         | n.a.             | Czech Republic |
| LEGPS207         | PI 162910        | Paraguay      | LEGPS244         | CGN16639         | Ethiopia       | LEGPS281         | n.a.             | Czech Republic |
| LEGPS208         | PI 164568        | India         | LEGPS245         | CGN16582         | Nepal          | LEGPS282         | n.a.             | Czech Republic |
| LEGPS209         | PI 195405        | Guatemala     | LEGPS246         | CGN03190         | Turkey         | LEGPS283         | n.a.             | Czech Republic |
| LEGPS210         | PI 203065        | Finland       | LEGPS247         | CGN03165         | Turkey         | LEGPS284         | n.a.             | n.a.           |
| LEGPS211         | PI 204667        | Netherland    | LEGPS248         | CGN03229         | Ethiopia       | LEGPS285         | JI 1210          | France         |
| LEGPS212         | PI 220673        | Afghanistan   | LEGPS249         | PI 311112        | Guatemala      | LEGPS286         | JI 1412          | n.a.           |
| LEGPS213         | PI 234262        | USA           | LEGPS250         | PI 324705        | France         | LEGPS287         | JI 1559          | Mexico         |
| LEGPS214         | PI 254625        | Finland       | LEGPS251         | PI 266070        | Sweden         | LEGPS288         | JI 1747          | n.a.           |
| LEGPS215         | PI 254626        | Australia     | LEGPS252         | PI 180329        | India          | LEGPS289         | JI 82            | Afghanistan    |
| LEGPS216         | PI 262189        | Costa Rica    | LEGPS253         | PI 184131        | Serbia         | LEGPS290         | n.a.             | n.a.           |
| LEGPS217         | PI 269760        | UK            | LEGPS254         | JI 2480          | Peru           | LEGPS291         | n.a.             | n.a.           |
| LEGPS218         | PI 272143        | Germany       | LEGPS255         | JI 1951          | China          | LEGPS292         | W6 17516         | USA            |
| LEGPS219         | PI 280621        | USSR          | LEGPS256         | JI 2302          | n.a.           | LEGPS293         | W6 17517         | USA            |
| LEGPS220         | PI 312135        | Guatemala     | LEGPS257         | JI 1566          | n.a.           | LEGPS294         | W6 17518         | USA            |
| LEGPS221         | PI 312136        | Guatemala     | LEGPS258         | PI 608038        | USA            | LEGPS295         | W6 17520         | USA            |
| LEGPS222         | PI 314796        | Australia     | LEGPS259         | PI 613100        | USA            | LEGPS296         | W6 17519         | USA            |
| LEGPS223         | PI 319373        | Mexico        | LEGPS260         | n.a.             | Australia      | LEGPS297         | W6 17521         | USA            |
| LEGPS224         | PI 326194        | Mexico        | LEGPS261         | n.a.             | Australia      | LEGPS298         | IFPI 3365        | Turkey         |
| LEGPS225         | PI 343962        | Turkey        | LEGPS262         | n.a.             | Australia      | LEGPS299         | IFPI 2370        | Ethiopia       |
| LEGPS226         | PI 343984        | Turkey        | LEGPS263         | n.a.             | Australia      | LEGPS300         | PI 358608        | Ethiopia       |
| LEGPS227         | PI 343993        | Turkey        | LEGPS264         | n.a.             | Australia      | LEGPS301         | PI 116056        | India          |
| LEGPS228         | PI 347316        | India         | LEGPS265         | n.a.             | Australia      | LEGPS302         | PI 274584        | Pakistan       |
| LEGPS229         | PI 347319        | India         | LEGPS266         | n.a.             | Australia      | LEGPS303         | n.a.             | Spain          |
| LEGPS230         | PI 347321        | India         | LEGPS267         | n.a.             | Australia      | LEGPS304         | n.a.             | Spain          |
| LEGPS231         | PI 347342        | India         | LEGPS268         | n.a.             | Australia      | LEGPS305         | n.a.             | Spain          |
| LEGPS232         | PI 347348        | India         | LEGPS269         | n.a.             | Australia      |                  |                  |                |
| LEGPS233         | PI 347366        | India         | LEGPS270         | n.a.             | n.a.           |                  |                  |                |
| LEGPS234         | PI 347374        | India         | LEGPS271         | n.a.             | n.a.           |                  |                  |                |
| LEGPS235         | PI 347375        | India         | LEGPS272         | n.a.             | Czech Republic |                  |                  |                |

---

|                 |           |       |                 |      |                   |
|-----------------|-----------|-------|-----------------|------|-------------------|
| <b>LEGPS236</b> | PI 347388 | India | <b>LEGPS273</b> | n.a. | Czech<br>Republic |
| <b>LEGPS237</b> | PI 347389 | India | <b>LEGPS274</b> | n.a. | Czech<br>Republic |

---

**n.a.** – Not available
